1 **Microbial turnover and dispersal events occur in sync with plant phenology in the**  
2 **perennial evergreen tree crop, *Citrus sinensis***

3

4 Nichole A. Ginnan<sup>1</sup>, N. Itzel De Anda<sup>1</sup>, Flavia Campos Freitas Vieira<sup>1</sup>, Philippe Rolshausen<sup>2</sup>,  
5 and M. Caroline Roper<sup>1\*</sup>

6

7 <sup>1</sup>Department of Microbiology and Plant Pathology, University of California, Riverside, CA

8 <sup>2</sup>Department of Botany and Plant Sciences, University of California, Riverside, CA

9

10 \*Corresponding author. Email: [mcroper@ucr.edu](mailto:mcroper@ucr.edu); Phone: 951-827-3510

11

12

13

14

15

16

17

18

19

20

21

22

23

24

25

26

27

28

29 **Abstract**

30 Emerging research indicates that plant-associated microbes can alter plant developmental  
31 timing. However, it is unclear if host phenology impacts microbial community assembly.  
32 Microbiome studies in annuals or deciduous perennial plants face challenges in separating effects  
33 of tissue age from phenological driven effects on the microbiome. In contrast, evergreen  
34 perennial trees, like *Citrus sinensis*, retain leaves for years allowing for uniform sampling of  
35 similarly aged leaves from the same developmental cohort. This aids in separating phenological  
36 effects on the microbiome from impacts due to annual leaf maturation/senescence. Here we used  
37 this system to test the hypothesis that host phenology acts as a driver of microbiome  
38 composition. *Citrus sinensis* leaves and roots were sampled during seven phenological stages.  
39 Using amplicon-based sequencing, followed by diversity, phylogenetic, differential abundance,  
40 and network analyses we examined changes in bacterial and fungal communities. Host  
41 phenological stage is the main determinant of microbiome composition, particularly within the  
42 foliar bacteriome. Microbial enrichment/depletion patterns suggest that microbial turnover and  
43 dispersal were driving these shifts. Moreover, a subset of community shifts were  
44 phylogenetically conserved across bacterial clades suggesting that inherited traits contribute to  
45 microbe-microbe and/or plant-microbe interactions during specific phenophases. Plant  
46 phenology influences microbial community composition. These findings enhance understanding  
47 of microbiome assembly and identify microbes that potentially influence plant development and  
48 reproduction.

49

50 **Key words:** *Citrus sinensis*, dispersal, evergreen, flowering, fruiting, microbiome, perennial,  
51 plant phenology

52

53

54

55

56

## 57 INTRODUCTION

58 Plant phenology, the periodic timing of plant life cycle events, is innately linked to  
59 exogenous climatic variables that affect plant development, such as temperature, photoperiod,  
60 nutrient and water availability, as well as other abiotic and biotic factors<sup>1,2</sup>. Additionally,  
61 endogenous genome-encoded factors such as dynamic internal photosynthate source-sink  
62 pathways, intricate phytohormone signaling networks and other developmental regulatory  
63 processes mediate the transition between phenological stages<sup>3,4</sup>. The timing of specific  
64 developmental stages, such as flowering, can determine a plant's geographic distribution range as  
65 well as determine crop yield and productivity<sup>5,6</sup>. Alterations in plant phenology can also have a  
66 cascading effect on the fitness of organisms that depend on those specific plants for nutrient  
67 acquisition, such as pollinator species<sup>7-9</sup>.

68 Citrus is a significant economic crop and provides several health benefits because of the  
69 myriad of nutrients, antioxidants, vitamins, minerals and dietary fiber found in fresh and juiced  
70 citrus fruits<sup>10-12</sup>. Citrus varieties are grown across the globe, and because of this, citrus  
71 phenology is well characterized to guide management strategies of different varieties for specific  
72 climatic conditions. Phenological modeling of citrus has focused primarily on buds, flowers and  
73 fruit and is used to predict bloom time across different growing regions<sup>13</sup>. This has implications  
74 for protecting flowers from floral pests and pathogens by allowing growers to time spray  
75 applications in an informed manner. Citrus flowers are a significant source of nectar related to  
76 honey production, particularly in California's Central Valley. As such, bloom timing models are  
77 also important for the beekeeping industry<sup>14</sup>. In addition, bloom time and duration models can be  
78 extrapolated to predict fruit set<sup>15</sup> and these performance models can provide yield predictions.

79 Soil and rhizosphere microbiomes can drive changes in flowering time in the herbaceous  
80 perennial plant *Boecheria stricta*, a wild relative of *Arabidopsis*<sup>16,17</sup> and affect other above  
81 ground plant traits in the annual plant system, *Brassica rapa*<sup>18,19</sup>. However, questions about  
82 microbiome shifts associated with transitions between phenological stages have not been  
83 addressed in perennial trees, particularly domesticated evergreens like citrus<sup>20</sup>. Citrus phenology  
84 models primarily take into account temperature and number of degree days above a certain  
85 threshold temperature<sup>15</sup>, but to the best of our knowledge, have not incorporated studies on the  
86 microbial communities associated with transitions across phenological stages. The citrus  
87 microbiome is an emerging prototype for understanding microbial contributions to plant health in

88 a perennial arboreal crop system<sup>21–25</sup>. Due to its well-defined phenology, citrus is an ideal  
89 system to investigate the interplay between host phenology and microbial community  
90 composition.

91         Several seminal studies in annual and short-lived perennial plants have characterized  
92 changes in rhizosphere and root microbiome composition across plant developmental cycles,  
93 suggesting that host phenology drives these alterations<sup>26–31</sup>. However, Dombrowski *et al.* 2017  
94 suggests that initially microbiota are sequentially acquired resulting in community changes as the  
95 host ages, but eventually the microbiome matures and stabilizes, functioning independently from  
96 host development<sup>32</sup>. Another recent study supports the idea that time is a stronger predictor of  
97 microbiome composition than plant developmental stage<sup>33</sup>. This prompts discussion on whether  
98 these community shifts are a consequence of tissue age and a microbiome maturation process, or  
99 if these changes are driven by plant phenology. In addition to producing and maturing leaves and  
100 roots throughout the year, long-lived evergreen perennial plant systems retain mature leaves for  
101 up to four years, which allows for selection of leaf tissues of similar age and developmental  
102 cohort across phenophases. Because of these features, we utilized this system to help decouple  
103 tissue age from host phenological effects and tested the hypothesis that host phenology acts as a  
104 driver of community compositional shifts within the above (foliar) and below (root) ground  
105 microbiomes of citrus. Indeed, we determined that the significant shifts in both diversity and  
106 composition of the microbial community structure were primarily driven by host phenological  
107 stages and not exogenous environmental factors such as rainfall, hours of irrigation or  
108 temperature. Foliar communities were more affected by host phenology than root microbiomes,  
109 which were comparably more stable. Interestingly, major alterations in foliar microbial  
110 community composition correlated with the shifts in source-to-sink pathways of carbohydrate  
111 transit, namely during the transition from floral bud break to full flowering to fruit set. More  
112 specifically, subsets of these taxa displayed temporal turnover patterns indicating that specific  
113 taxa were enriched as trees shifted to reproductive growth associated with fruit production. We  
114 also observed taxa typically associated with pollinator species that were substantially enriched  
115 only during flowering, suggesting that these microbes were introduced into the foliar  
116 microbiome as microbial immigrants via an insect-mediated dispersal mechanism.

117         In agricultural plant systems, comprehensive microbiome studies allow researchers to  
118 place an emphasis on how the microbiome as a whole function to promote overall plant health by

119 a variety of mechanisms, such as enhancing nutrient uptake or resisting pathogen ingress to  
120 promote a sustainable agroecosystem. Uncovering links between plant phenology and shifts in  
121 microbiome structure is the first step towards a mechanistic understanding of microbiome  
122 resilience over cyclical development in a perennial plant host. In addition, this can further serve  
123 as the foundation to understanding how the microbiome responds to changes in host  
124 development and, in turn, if microbiome community structure can influence host phenological  
125 transitions.

126

## 127 **MATERIALS AND METHODS**

128 **Sample collection and field sites.** In this longitudinal study we collected leaf (n=159) and root  
129 (n=159) samples from eight trees, at 20 timepoints (monthly for first sample year, targeted  
130 sampling second year) starting July 2017- April 2019 from Late Navel Powell sweet orange trees  
131 grown at UC Lindcove Research and Extension Center in Exeter, CA. We sampled  
132 approximately one-year old leaves that were from the previous year's flush and, thus, in a  
133 separate developmental cohort than the reproductive structures on the trees at the time of  
134 sampling. Trees were planted in 1997 (20-22 years old at time of sampling) and managed with  
135 conventional farming strategies similar to industry orchards. Prior to each monthly sampling,  
136 trees were visually assessed, and developmental stages were recorded. Seven major phenological  
137 stages were used for categorization in this study. These included Spring vegetative shoot flush,  
138 referred to as “flush” (F) (February – March), early floral bud break and development referred to  
139 as “floral bud development” (FB) (March), full flowering (FF) (April), fruit set (FS) (May –  
140 July), exponential fruit growth and development, referred to as “fruit development” (FD)  
141 (August – October), color break (initiation of fruit maturation, CB) (November – December), and  
142 mature fruit (MF) (January) (Fig. 1). Mature fruits were harvested between our April FF and  
143 May FS sampling events. Fertilizer treatments and/or amendments and number of hours irrigated  
144 were collected as monthly metadata variables. Each tree was divided into 4 quadrants (north,  
145 south, east, and west) and stems with attached young, fully expanded metabolically active,  
146 mature leaves from the current year (petiole attached) were collected from each quadrant and  
147 pooled into a sterile 24 oz. stand-up whirl-pak bag (Nasco B01401, Fort Atkinson, WI). Leaves  
148 were sampled from fruit bearing and non-bearing branches at random and all leaves from a  
149 single tree were pooled. Feeder roots were sampled from two sides of the tree approximately 0.5

150 meters away from the base of the trunk near the irrigation line and sealed in an additional sterile  
151 24 oz. stand-up whirl-pak bag (Nasco B01401, Fort Atkinson, WI). Gloves were changed and  
152 clippers and shovels were sterilized with 30% household bleach between samples. All samples  
153 were immediately placed on ice in a cooler for transit to the laboratory, then immediately frozen  
154 at -20°C. Samples were inspected by the California Department of Food and Agriculture  
155 according to California citrus quarantine protocols prior to overnight shipment to UC Riverside  
156 on dry ice. Samples were kept frozen on dry ice while processing for downstream DNA  
157 extractions. Leaf tissue was removed from stems and chopped into smaller pieces and root tissue  
158 was rinsed with sterile water to remove surface soil. Both tissues were put in 50 ml falcon tubes  
159 and stored at -80°C then lyophilized with a benchtop freeze dryer (Labconco FreeZone 4.5L,  
160 Kansas City, MO) for 16 to 20 hours. DNA extractions were performed according to published  
161 protocols<sup>21</sup>. The DNA was stored at -20°C until utilized for bacterial and fungal Illumina library  
162 construction.

163  
164 **High-throughput sequencing library preparation.** Leaf and root bacterial communities were  
165 sequenced from all leaf and root samples (20 time points). Bacterial Illumina Miseq libraries  
166 were built by amplifying the bacterial rRNA 16S V4 region using the 515FB/806RB primer set  
167 and the standardized Earth Microbiome Project protocol, which can be found online at  
168 <http://press.igsb.anl.gov/earthmicrobiome/protocols-and-standards/16s/><sup>34</sup>. To limit the  
169 amplification of plant mitochondrial and plastid 16S regions, we used pPNA and mPNA clamps,  
170 which bind to these plant sequences and block binding of the bacterial 515FB/806RB. Leaf  
171 sample reactions received 0.75 µM of pPNA and mPNA clamps and 0.75 µM of mPNA was  
172 added to each root sample reaction.

173 The first 14 consecutive monthly leaf and root samples were included in fungal  
174 community libraries. Our preliminary analyses shifted our main focus to bacterial communities,  
175 therefore we did not sequence the fungal communities of leaf/roots collected at the last 6 time  
176 points in the second sampling year. Fungal Illumina MiSeq libraries were built by amplifying the  
177 fungal ITS1 region using the ITS1f/ITS2 primer set and the standardized Earth Microbiome  
178 Project protocol, which can be found online at  
179 <http://press.igsb.anl.gov/earthmicrobiome/protocols-and-standards/its/>.

180 Triplicate PCR reactions for each sample were pooled and amplification was verified on  
181 a 1% agarose gel. Amplicon samples were quantified for DNA concentration using Quant-iT  
182 PicoGreen (Invitrogen). Equal amounts of amplicons (240 ng) from each sample were pooled  
183 and AMPure XP (Beckman Coulter) beads were used to clean the sample library. The cleaned  
184 library was then quantified using Qubit (Qiagen) (260/280). The libraries were diluted to 20-30  
185  $\mu\text{g}/\text{mL}$  and a final quality assessment was done with a Bioanalyzer at the UCR Genomics Core  
186 facility. Paired-end sequencing (2X300) was performed on an Illumina MiSeq platform with a  
187 20% PhiX spike included before sequencing.

188  
189 **Data processing and statistics.** Demultiplexed, PhiX reads removed, and Illumina adapter  
190 trimmed sequences were received from the UCR Genomics Core. Amplicon sequencing raw  
191 reads for 16S rRNA genes and fungal ITS2 region are available on the NCBI SRA database  
192 under BioProject accession number PRJNA685913. Bacterial and fungal reads were pre-  
193 processed using a USEARCH(v9.1.13)/VSEARCH(v2.3.2) pipeline. Forward and reverse  
194 sequencing files were joined with USEARCH allowing for staggered ends and up to 10  
195 mismatches. After quality filtering using VSEARCH, there were 65.5million 16S reads and 21.1  
196 million fungal reads. Sequences were dereplicated, singletons were removed, and OTUs were  
197 formed using USEARCH with a 97% similarity cut-off. The bacterial library produced 19,626  
198 OTUs which were assigned to 4,183 taxonomic names using the RDP 16S database, v18. The  
199 fungal library produced 44,447 OTUs which were assigned to 31,056 taxonomic names using the  
200 UNITE fungal reference database, v02.02.2019. On average, 12.7% of the 16S library reads from  
201 each leaf and root sample were assigned as bacteria. See Supplementary Table S1 for all 16S  
202 bacterial read counts of individual samples. The remaining sequences, which were removed,  
203 were attributed to chloroplast, plant mitochondria, Archaea, or could not be assigned to a  
204 Kingdom. Our fungal libraries did not have non-specific binding issues. USEARCH was also  
205 used to create phylogenetic tree files in Newick format.

206 Pre-processed taxonomically assigned OTU tables were imported into R (v3.6.0).  
207 Samples with less than 1,000 reads were removed. Reads were rarified to even depth for each  
208 alpha diversity comparison. Alpha diversity was compared using the number of OTUs  
209 observed<sup>35</sup>. A ranked sums analysis of variance statistical test, Kruskal-Wallis, followed by a

210 pairwise Dunn's test with Holm's correction for multiple comparisons were used to calculate *P*-  
211 values.

212 Beta diversity analyses were performed using R packages phyloseq (v1.28.0) and vegan  
213 (v2.5.6)<sup>35,36</sup>. Pre-processed reads were transformed using total sum scaling normalization. Using  
214 the ordinate() and plot\_ordination() functions a Principal Coordinate Analysis (PCoA) was done  
215 on weighted Unifrac distances, which accounts for relative relatedness and quantitative variance  
216 of communities. Ninety-five percent confidence ellipses were added to further examine groups  
217 using the stat\_ellipse() function. A permutational multivariate analysis of variance  
218 (PERMANOVA) statistical test was performed on weighted Unifrac distances using the  
219 vegan::adonis() function, including the following covariates and interaction terms in the model:  
220 adonis(dist.matrix ~ phenology\*Sample\_year + Fertilizer\_app + Mean\_Temp\*hrs\_irrigated +  
221 Mean\_Temp\*Total\_rain, permutations=999) Pairwise PERMANOVA with FDR correction was  
222 accomplished with RVAideMemoire::pairwise.perm.manova() (v0.9.74)<sup>37</sup>. Core microbiota  
223 identifications were performed using microbiome::core() (v1.6.0) with prevalence set at 0.75 and  
224 detection set at 0.01/100<sup>38</sup>. The core root bacteriome was also defined with prevalence set at 0.75  
225 and detection set at 0.1/100, which did not impact the interpretation of the results, but greatly  
226 improved readability of the phylogenetic tree.

227 To understand if phylogenetic relationships impact microbial associations with  
228 phenological stages, core genera taxonomic assignments were input into a phylogenetic tree  
229 generator, phyloT v2 (<https://phyloT.biobyte.de/index.cgi>), to generate a Newick format  
230 phylogenetic tree. Tree and metadata were visualized using the interactive tree of life  
231 visualization program, iTOL (<https://itol.embl.de/>)<sup>39</sup>. Genera with less than 50 reads were filtered  
232 out and differentially abundant populations at the genus level were identified using DESeq2  
233 (v1.24.0) to run a parametric fit for dispersion on a negative binomial generalized linear model,  
234 followed by a Wald test with FDR adjustment to produce *P*-values<sup>40</sup>. Input root and leaf bacterial  
235 OTU tables used in DESeq2 analysis were rescaled using a pseudocount of 1. All possible  
236 phenological stage pairwise combinations were tested using results() and the contrast option.  
237 Using ggplot2 (v3.2.1) and phyloseq::subset\_taxa() function, the relative abundance of specific  
238 species were plotted as boxplots<sup>35,41</sup>.

239 The top 300 most abundant leaf bacterial OTUs were input into a network analysis using  
240 Sparse Inverse Covariance Estimation for Ecological Association Inference, Spiec-Easi (v1.0.7),



241 which infers interactions using neighborhood selection and the concept of conditional  
242 independence, rather than a standard correlation or covariance estimation<sup>42</sup>. With `set.seed(1244)`,  
243 neighborhood modeling (`mb`) was executed with the `nlambda` set to 70 and `rep.num` set at 99,  
244 standard settings were used for all other parameters. Spiec-Easi results were converted to `igraph`  
245 format and imported into Gephi (v0.9.2). The network was visualized using a Yifan Hu layout  
246 and taxa were filtered to focus on differentially abundant taxa and immediate neighbors.  
247 Betweenness centralities were calculated using Gephi network diameter statistics and centralities  
248 were normalized to a 0-1 scale. Taxa were further filtered by abundance with the final figure  
249 showcasing the 155 most abundant OTUs within the above parameters. This significantly  
250 increased readability without impacting the interpretation of the results.

## 251 RESULTS

252 **Significant shifts in alpha diversity occur across phenological stages.** We focused our study  
253 on seven citrus phenophases that included, Spring vegetative shoot flush, referred to as “flush”  
254 (F), early floral bud break and development (FB), full flowering (FF), fruit set (FS), exponential  
255 fruit growth and development, referred to as “fruit development” (FD), color break (initiation of  
256 fruit maturation, CB) and mature fruit (MF). Citrus phenological stages can overlap on  
257 individual trees and some stages span multiple months, thus, some stages include multiple  
258 months of sampling (Fig. 1 and Supplementary Fig. S1). Overall, bacterial and fungal leaf  
259 microbiomes had the most significant shifts in alpha diversity across phenological stages when  
260 compared to the root microbiomes. Specifically, alpha diversity in both the leaf bacteriome and  
261 mycobiome remained consistent as trees transitioned from leaf flush to flowering (floral bud  
262 development and full flowering). Following full flowering, there was a significant increase in  
263 alpha diversity in the leaf bacteriome and mycobiome at fruit set (Fig 2a,b). Species richness  
264 within the leaf bacteriome significantly decreased when trees transitioned from fruit growth and  
265 development to color break and mature fruit stages.

266 Despite being relatively stable across the study, root bacteriome alpha diversity peaked  
267 during full flowering. Similar to the overall leaf microbiome, the root mycobiome had the  
268 highest alpha diversity during fruit set (Fig. 2c, d). Our study did not discriminate between  
269 rhizoplane and endophytic root microbiota nor was it possible to select feeder roots of a specific

270 age cohort. Future work that separates these compartments in similarly aged roots may reveal  
271 more finely resolved shifts in species richness associated with these root environments.

272

273 **Host phenological stage is a major determinant of community composition.** Although  
274 climatic variables can be difficult to uncouple from plant development variables, the greatest  
275 amount of the variation in the data was attributed to the host phenological stage for all four  
276 communities (PERMANOVA,  $P \leq 0.001$ ,  $r^2 = 0.081 - 0.280$ ) (Table 1, Fig. 3). Time (i.e., sample  
277 year) had less impact than phenology on beta diversity across all communities (Table 1,  
278 Supplementary Fig. S2). Interestingly, the community composition (beta diversity) of leaf  
279 bacteriome and mycobiome was more influenced by host phenology than root communities,  
280 indicating that changes in host phenology had a larger influence on diversity within foliar  
281 microbiomes than in root microbiomes. Specifically, a principal coordinate analysis of UniFrac  
282 distances indicated significant clustering of individual microbial communities by phenological  
283 stage (Fig. 3). In a pairwise comparison of community compositional differences between each  
284 phenological stage, the leaf bacteriome had the greatest number of significant adjusted  $P$ -values,  
285 with 21 out of the 21 pairwise comparisons being significantly different, followed by the leaf  
286 mycobiome (19 out of 21 comparisons) (Supplementary Table S2). Root communities had fewer  
287 significantly different pairwise comparisons (Root Mycobiome = 5/21, Root Bacteriome = 8/21).

288 Rainfall, fertilizer applications, temperature, and irrigation hours fluctuated across our  
289 sampling period (Supplementary Fig. S1, Supplementary Table S3). Rainfall was sparse in this  
290 sample location (the Central Valley of California), ranging from 0.00 – 2.55 inches each month  
291 (Supplementary Fig. S1b, Supplementary Table S3) and total rainfall was a minor determinant of  
292 community structure across all four communities, explaining only 0.9 - 3.2% of the variation  
293 (PERMANOVA,  $P \leq 0.001 - 0.104$ ,  $r^2 = 0.009 - 0.032$ ) (Table 1). Similarly, fertilizer application  
294 describes a small percentage (1.0 - 5.8%) of the variation in the data for all four communities  
295 examined. We evaluated temperature based on the average temperature, and interactive effects it  
296 might have with water availability (Hrs. of irrigation and total rain) in order to capture the full  
297 range of conditions that could impact microbial community composition. Temperature had a  
298 minor impact on communities, as this factor only describes 0.5 - 4.2% of the variation in the data  
299 that include temperature as an interaction factor. In addition to phenology, interactions between

300 phenology and sample year were a driving factor of leaf bacterial community composition,  
301 explaining 10.6% of the changes across the data (PERMANOVA,  $P \leq 0.001$ ,  $r^2 = 0.106$ ).

302 Taken together, these beta diversity analyses indicate that plant phenological stage was  
303 the major driving factor in community composition for bacterial and fungal communities  
304 associated with leaves and roots. Significant compositional shifts are also visible at the phyla-  
305 level, particularly in the leaf bacterial community (Supplementary Fig. S3). Other covariates  
306 tested (irrigation, mean temperature, fertilizer applications, rainfall, and sample year) were minor  
307 or insignificant contributors to citrus-associated leaf and root microbiome composition.

308  
309 **Stable, phylogenetically conserved microbial signatures across phenophases.** We identified  
310 core microbial taxa for each of our seven phenological stages. Our core bacterial and fungal leaf  
311 and fungal root microbiomes include genera that were greater than 0.01%, and core root  
312 bacteriome greater than 0.1%, relative abundance in at least 75% of the samples within a  
313 phenological stage. All of our downstream analyses use genera that meet our core taxa cutoffs in  
314 at least one phenophase. We assessed our core taxa and separated them into three categories: (1)  
315 High stability=core member of six or more phenophases; (2) Medium stability=core member of  
316 three, four, or five phenophases; (3) Low stability=core member of two or less phenophases. We  
317 determined that of the identified core there were 3 (5.2%) leaf bacterial, 8 (30.7%) leaf fungal,  
318 62 (70.4%) root bacterial, and 22 (61.1%) root fungal core genera that had high stability across  
319 phenophases (Fig. 4, Supplementary Fig. S4). This suggests that both bacterial and fungal root  
320 communities have a substantially greater number of consistent or stable microbial features across  
321 the developmental cycle. However, our experimental design did not differentiate between  
322 endophytes versus epiphytes and, thus, may have missed some fine resolution microbial  
323 community shifts occurring between the endosphere and episphere. There were two bacterial  
324 (*Pseudomonas* and *Sphingomonas*) and one fungal (*Aureobasidium*) genera that were highly  
325 stable in both roots and leaves (Fig. 4c,d).

326 A phylogenetic analysis of the core genera indicates that both bacterial and fungal root  
327 communities were rich in highly stable and phylogenetically diverse core taxa (Supplementary  
328 Fig. S4). Root core genera from the bacterial clade Alphaproteobacteria (Class) and the fungal  
329 Family Pleosporomycetidae were all or nearly all binned as highly stable, indicating that genera  
330 in these clades were consistently high in relative abundance across all phenological stages.

331 Medium and low stability core genera appear randomly dispersed across the root community  
332 phylogeny, with no obvious patterns.

333         However, leaf bacterial and fungal core community phylogenetic trees contained high,  
334 medium, and low stability patterns at the Class and Phyla levels (Fig. **4a,b**). All core genera in  
335 the fungal Class Tremellomycetes had medium to high stability. In contrast, all core genera in  
336 the fungal Class Sordariomycetes had low stability across phenophases, and only met the defined  
337 core cutoffs during fruit set or mature fruit stages. The leaf taxa within the bacterial Class  
338 Gammaproteobacteria consisted of genera with high, medium, and low stability across the  
339 phenophases. Interestingly, all the Gammaproteobacteria were a core member of the full  
340 flowering or floral bud break microbiomes regardless of their stability in other phenophases.  
341 Another distinct phylogenetic pattern observed in the leaf community was genera in the bacterial  
342 Phylum Actinobacteria that had low or medium stability across all phenophases. However,  
343 95.0% of core genera in the Actinobacteria clade were core during fruit set and/or fruit  
344 development. The only exception to this within the Actinobacteria clade was *Bifidobacterium*,  
345 which was associated only with full flowering and was not a core member of fruit set or fruit  
346 development microbiomes (Fig. **4a**). Lastly, the leaf bacterial Class Betaproteobacteria contains  
347 low to medium stability core genera with the most dispersed stage associations.

348         Overall, these data indicate that root bacterial and fungal communities have greater  
349 stability across phenophases than leaves (Fig. **4c,d**). Additionally, core taxa had  
350 phylogenetically related trends within the high, medium, and low stability classifications  
351 indicating that conserved, vertically descended microbial traits may play a role in determining  
352 bacterial and fungal associations across phenophases, particularly in above ground leaf tissue.

353  
354 **Specific taxa were enriched in the foliar microbiome across the flowering phenophases.** We  
355 completed a genus-level differential abundance analysis on our list of core taxa that were  
356  $\geq 0.01\%$  relative abundance and  $\geq 75\%$  prevalence in one or more phenophases. Our differential  
357 abundance analysis can determine finer scale phenophase associations beyond just classification  
358 as a core microbiome member by looking for increases in abundance (enrichments) during  
359 specific phenophases. Among all the phenophases, those associated with flowering (floral bud  
360 development and full flowering), had striking microbial enrichments, particularly among the leaf  
361 bacteria. *Acinetobacter* was a core member of five phenophases, but was significantly enriched

362 during full flowering when compared to other phenophases (Fig. **5a**). *Acinetobacter* had a  
363 gradual enrichment from flush, floral bud development, to full flowering. This gradual  
364 enrichment signature indicates that *Acinetobacter* was present throughout the year, but has a high  
365 temporal turnover rate that is in sync with the transitions from flush to floral bud development  
366 and then to full flowering.

367 We also observed bacteria that were sharply enriched during full flowering rather than  
368 undergoing gradual enrichments over the phenophases that lead up to full flowering (flush and  
369 floral bud development). These include *Snodgrassella*, *Frischella*, *Gilliamella*, and  
370 *Bifidobacterium* (Fig. **5b-e**). The sharp enrichment patterns during full flowering suggest that  
371 these taxa are introduced into the community via a dispersal event.

372  
373 **Foliar microbial depletions associated with flowering.** We also identified bacterial leaf genera  
374 that had significant depletions during floral bud development and/or full flowering (Fig **6a-h**).  
375 Four Actinobacter genera *Corynebacterium*, *Dietzia*, *Georgenia*, and *Ornithinimicrobium* were  
376 significantly depleted during floral bud development and full flowering (Fig. **6a-d**). *Bacillus*,  
377 *Methylobacterium*, *Romboutsia*, and *Sphingomonas* also significantly decreased in relative  
378 abundance during floral bud development and/or full flowering (Fig. **6e-h**). For all differentially  
379 abundant genera, including bacteria and fungi, across all phenophases see supplemental figure  
380 S5, and supplemental table S4.

381  
382 **Microbe-microbe interactions contribute to phenophase specific community structure.** We  
383 performed a network analysis on the foliar bacterial communities from all samples with a focus  
384 on the significantly enriched and/or depleted populations and any populations they have direct  
385 connections with (neighbors). The goal of this approach was to give a broad overview of  
386 bacterial interactions across phenophases and identify taxa that potentially interact with specific  
387 phenophase-enriched taxa and potentially play a role in observed seasonal community  
388 compositional shifts. *Rhizobium*, *Sphingomonas*, an unknown bacteria, an unknown Bacillaceae  
389 (family), *Acinetobacter*, and *Romboutsia* have the highest normalized betweenness centrality  
390 scores ranging from 0.110 – 0.187. Betweenness centrality is a proxy for influence within a  
391 network because it measures how often a particular node (i.e., taxon) is the shortest connection  
392 or bridge between two other nodes. These high betweenness centrality scores and placement  
393 within the network indicates that these genera are potentially keystone taxa that may perform a

394 stabilizing role in the microbial communities across phenological transitions and events (Fig. 7,  
395 red nodes). Groups of taxa connected by putative positive interactions cluster together to form  
396 distinct modules. These modules are separated by putative negative interactions. Our analysis  
397 organized bacterial taxa that were enriched in fruit set and fruit development into a single highly  
398 connective community module (cluster) (Fig. 7, blue nodes). This suggests that fruit set and fruit  
399 development associated microbiomes are compositionally similar and few microbe-microbe  
400 interactions change during the transition from fruit set to fruit development. Leaf bacteria  
401 associated with flowering also formed a module within the network (Fig. 7, purple nodes).  
402 Specific bacteria within the fruit set/development and flowering modules also interact with taxa  
403 that were enriched in the other four phenophases, which cluster together into a third module (Fig.  
404 7, grey nodes). Overall, these predicted positive interactions represent inter- or co-dependent  
405 microbe-microbe relationships, and the putative negative interactions indicate potential direct  
406 (e.g., antibiosis) or indirect (e.g., resource exclusion) competition. These predicted microbe-  
407 microbe interactions within the microbiome likely impact community composition in addition to  
408 the exogenous influences of abiotic environmental conditions and biotic host physiological  
409 factors (e.g., carbon availability).

## 410 **DISCUSSION**

411 The majority of studies examining how plant developmental stage impacts the plant's  
412 microbiome have focused on bacteria associated with the rhizosphere of annuals or herbaceous  
413 perennials such as maize<sup>43,44</sup>, rice<sup>28</sup>, sorghum<sup>26,45</sup>, wheat<sup>46</sup>, *Arabidopsis*<sup>29</sup> and *Boechera*<sup>30</sup>. These  
414 important studies indicate that rhizosphere-associated microbiomes can shift in association with  
415 plant developmental stages in both domesticated and wild plants that have short-lived above  
416 ground tissues. Studies of the endophytic xylem sap microbiome in grapevine, a deciduous  
417 perennial, also showed microbial shifts were linked to changes in phenological stage<sup>47</sup>. However,  
418 much less is known about how overall plant phenology impacts above and below ground  
419 microbiomes of evergreen woody perennials that have lifespans that can be decades long and can  
420 retain their leaves for multiple years, as compared to annuals or deciduous perennials that  
421 produce and shed all their leaves each season. Here, we investigated microbiome dynamics in  
422 above and below ground tissues of mature twenty-year old *Citrus sinensis* trees to determine if  
423 temporal microbiome fluctuations were associated with host phenological events. The unique

424 contribution of our research was the separation of leaf development from tree phenology. We did  
425 this by analyzing the changes in the foliar microbiome on fully mature leaves, which developed  
426 as part of the same leaf cohort from the previous year, in relation to the phenological stages of  
427 the current year. Thus, are exposed to the same starting inoculum, minimizing the bias of any  
428 potential priority effects (i.e., order of arrival).

429 Our results indicate that the phyllosphere microbiome has an active and dynamic  
430 relationship with host phenology. More specifically, microbial shifts occurred as trees  
431 transitioned from the spring leaf flushing stage and entered flowering. The transition from spring  
432 flush to floral bud development and full flowering aligns with important transitions in source-to-  
433 sink transport of photosynthate in the tree<sup>4</sup>. During foliar flushing periods, young leaves are a  
434 primary carbohydrate sink as they rapidly expand and mature. This source-to-sink transport of  
435 photosynthate essentially reverses during floral bud break and development, when mature leaves  
436 transition to serve as source tissues and begin transporting photosynthates to developing floral  
437 tissues that are now the primary sink tissues. In addition to changes in source-to-sink transport,  
438 there are also significant changes in water dynamics within the canopy of the tree associated with  
439 full flowering. Flowers have the highest transpiration rate of the tree even compared to the  
440 leaves, which drastically increases the amount of water being transported into the overall canopy  
441 of the tree<sup>4</sup>. Interestingly, the significant shift in overall foliar community composition from  
442 flushing to full flowering was not coupled with a change in species richness indicating that the  
443 same taxa were present, just in different relative abundances in relation to one another. This  
444 demonstrates that foliar microbiome assemblage is changing in sync with tree physiology and  
445 development.

446 Empirical data, including presence/absence and relative abundance, can also be used to  
447 infer patterns or microbial enrichments and/or depletions as well as ecological mechanisms that  
448 contribute to plant microbiome assembly, such as microbial species turnover and dispersal<sup>48-50</sup>.  
449 Interestingly, microbial enrichment and depletion patterns of specific taxa suggest that microbial  
450 species turnover and dispersal events within the citrus microbiome occur in sync with  
451 phenological stage transitions. These enrichment/depletion patterns for specific taxa were more  
452 apparent in leaves than in the root compartment. Specifically, the bacterial genus *Acinetobacter*  
453 was enriched in leaves as trees transitioned from spring flush to floral bud development and  
454 peaked in relative abundance during full flowering, which is when leaves shift from acting as

455 sink tissues to becoming source tissues. This may create a microenvironment that selects for an  
456 increase in relative abundance of these taxa when carbohydrate is translocating out of the leaves.  
457 Plant-associated *Acinetobacter* spp. have plant growth promoting properties that include  
458 antagonism towards fungi<sup>51</sup>, the ability to solubilize phosphate and to produce the plant  
459 hormone, gibberellic acid<sup>52,53</sup>. *Acinetobacter* spp. are highly abundant in the floral nectar  
460 microbiome of *Citrus paradisi* and other plant species<sup>54,55</sup> and were identified as a core member  
461 of the grapevine xylem sap microbiome<sup>47</sup>. Its significant increase in relative abundance in the  
462 leaf microbiome at the time of flowering in citrus suggests a potential synergy between the foliar  
463 and floral microbiomes. *Acinetobacter* was also predicted to be a keystone taxon and was a  
464 major link between the flowering community and fruit set/development community clusters in  
465 our network. This enrichment in *Acinetobacter* may be simply due to selection imposed on the  
466 microbial community by the local plant environment, but it is tempting to speculate that  
467 *Acinetobacter* spp. provide an exogenous service to the plant by producing gibberellic acid and  
468 biologically available phosphorus to promote flowering that is in phase with its host's  
469 phenological development. This hypothesis that the plant environment selects for taxa within its  
470 foliar microbiome that, in turn, promotes its own reproductive growth warrants future inquiry.  
471 Specific bacterial enrichments also occurred at bloom time in grapevine further supporting the  
472 evidence of a host driven microbial response to environmental cues derived from shifts in plant  
473 developmental stage<sup>47</sup>.

474 We also observed signatures that indicate specific taxa were depleted in relative  
475 abundance during flowering, but enriched during fruit set. Phylogenetic reconstruction of these  
476 taxa indicates that the majority of the taxa belonging to the Actinobacteria phylum (19 of the 20  
477 genera) were significantly depleted during flowering, but subsequently enriched when trees  
478 begin to set fruit. This phylogenetic conservation of depletion/enrichment patterns within the  
479 Actinobacteria clade indicates that this is a non-random fluctuation within the microbiome  
480 structure associated with the transition from flowering to fruit production. As citrus trees set  
481 fruit, the fruits themselves begin exporting and importing hormones, such as indole acetic acid  
482 and cytokinins, respectively<sup>3</sup>. This results in a change in hormone levels in leaves as well. These  
483 hormonal shifts may place selective pressure on the microbial community that the foliar  
484 Actinobacteria are particularly responsive to that lead to significant enrichments during fruit set  
485 and development. Specific differentially abundant taxa within the Actinobacteria clade that



486 followed this pattern included *Corynebacterium*, *Dietzia*, *Georgenia*, and *Ornithinimicrobium*.  
487 Members of these genera can fix nitrogen and produce IAA, both of which are important  
488 supporters of fruit development<sup>56-59</sup>. Thus, it is tempting to speculate that these taxa could play a  
489 role in co-regulating fruit development in a manner that is synergistic with the host's production  
490 of reproductive hormones. The biological role of Actinobacteria in the foliar microbiomes of  
491 plants is not well understood but overall species richness was conserved across all phenological  
492 stages, except for fruit set, indicating that this phenological stage allows for microbial  
493 enrichments of specific taxa, particularly those belonging to the Actinobacteria phylum. Leaf  
494 bacteria within the same clade may have similar functional roles, suggesting that members of the  
495 *Actinobacteria* phylum play an important role in the foliar microbiome during fruit set.

496 Genera outside of the Actinobacteria clade were also depleted in leaves during floral bud  
497 development and full flowering, including *Bacillus*, *Methylobacterium*, *Romboutsia*, and  
498 *Sphingomonas*. Notably, *Romboutsia* and *Sphingomonas* were predicted to be keystone taxa in  
499 our microbe-microbe interaction network analysis, and all are in the top 20% highest  
500 betweenness centrality scores. Keystone taxa play a stabilizing role in microbial communities.  
501 Depletion of these taxa during flowering may have cascading effects that influence microbial  
502 species turnover by allowing other taxa, such as the Actinobacteria, to flourish during subsequent  
503 developmental stages like fruit set. This suggests that microbial turnover in the foliar  
504 microbiome is mediated by selective pressures imposed by the plant developmental stage in  
505 conjunction with microbe-microbe interactions to modulate community diversity and  
506 composition.

507 Microbial dispersal events can drive microbial turnover and influence the relative  
508 abundance of endogenous taxa in the community. Full flowering is a dynamic phenophase in  
509 plant development where there are frequent interactions between plants and pollinator species  
510 that rely on floral resources, like nectar and pollen. These macro-level interactions can also have  
511 impacts at the microorganismal level. Pollinator (e.g., bee) visitation alters flower surface,  
512 nectar, and subsequent seed microbial community composition<sup>60-63</sup>. During flowering, we  
513 observed sudden microbial enrichments of bacteria taxa belonging to the Betaproteobacteria and  
514 Gammaproteobacteria clades that include *Giliamella*, *Snodgrassella*, *Bifidobacterium*, and  
515 *Frischella*. These enrichments in these anaerobic taxa were unique to the flowering phenophase  
516 and quickly declined following flowering, suggesting they are immigrants to the community and

517 not endogenous members of the native microbiome. Moreover, these anaerobic taxa are  
518 prevalent in the bee gut microbiome<sup>64</sup>, therefore we hypothesize that these taxa were dispersed  
519 into the citrus microbiome during honeybee visitation. We consider this external influence host  
520 phenology associated because phenophase specific plant morphology (i.e., flowers) regulate this  
521 diffuse interaction. Bacteria can be introduced to plants by bees and potentially migrate from the  
522 flower to the vascular bundles resulting in systemic movement within the plant<sup>65-67</sup>. Leaf  
523 carbohydrate content is the highest during flowering, which may promote the growth of these  
524 fermenting bacteria<sup>4</sup>. Notably, *Bifidobacterium* was the only core leaf genus from the  
525 Actinobacteria phylum that was enriched during flowering whereas the other 19 Actinobacteria  
526 taxa were depleted during flowering. This further supports the hypothesis that *Bifidobacterium*  
527 was introduced via a dispersal event and is not part of the endogenous microbiota like the other  
528 taxa in the plant-associated Actinobacteria clade. Nectar-inhabiting bacteria can influence nectar  
529 volatile profiles that, in turn, influence pollinator visitation preferences<sup>68</sup> and it would be  
530 interesting to determine if these putative immigrants contribute to shifts in nectar volatile profiles  
531 that affect bee feeding behaviors.

532         The next frontier in microbiome research is to determine the functional roles that  
533 microbes play in microbe-microbe and host-microbiome interactions. Martiny et al. 2013 found  
534 that conservation of microbial traits was more strongly linked to vertical phylogenetic  
535 relatedness of the microorganisms within a microbiome than to traits that are shared among taxa  
536 by horizontal gene transfer<sup>69</sup>. Similarly, we also observed phylogenetic conservation within  
537 microbial enrichments suggesting that those groups of related organisms play similar functional  
538 roles during specific phenophases or across several phenophases. We speculate that taxa with  
539 high stability across phenophases may serve a community stabilizing function, while low  
540 stability or phenophase specific core microbes likely have more specialized, transient roles in the  
541 community. Because microbes can alter host phenology<sup>17,20,70-73</sup>, which is a critical factor in  
542 plant health and productivity, incorporation of microbial presence/absence and patterns of  
543 enrichment into plant phenological models may improve phenophase timing prediction, once the  
544 functional roles of these microbes are determined. This information could also lead to the  
545 commercialization of biofertilizers for horticultural purposes that could be applied at specific  
546 plant life stages to enhance crop productivity.

547

## 548 **ACKNOWLEDGMENTS**

549 The authors would like to thank Drs. Carol Lovatt, Kurt Anderson, and Nicole Rafferty for their  
550 insightful comments. This work was supported by USDA NIFA Grant No. 2017-70016-26053,  
551 CDFA Grant No. SCB16056 and 19-0001-034-SF, USDA National Institute of Food and  
552 Agriculture Hatch Projects 1002710, 233883 and the National Science Foundation Graduate  
553 Research Fellowship Program under Grant No. (NSF DGE-1326120). Any opinions, findings,  
554 and conclusions or recommendations expressed in this material are those of the author(s) and do  
555 not necessarily reflect the views of the National Science Foundation.

## 556 **COMPETING INTERESTS**

557 The authors declare that they have no competing interests.

558

## 559 **AUTHOR CONTRIBUTIONS**

560 NAG and MCR designed the project. NAG and PR conducted fieldwork. NAG and IDA  
561 processed field samples. NAG and FCFV built sequencing libraries. NAG performed data  
562 analyses. NAG and MCR wrote the manuscript. All authors contributed to the editing of the  
563 manuscript.

564

## 565 **DATA AVAILABILITY**

566 The data that supports the findings of this study are openly available in the NCBI SRA database  
567 under BioProject PRJNA685913. Data is available for review at the following link:

568 <https://dataview.ncbi.nlm.nih.gov/object/PRJNA685913?reviewer=6s46aglvstjai5arhqs2cp7434>

## 569 **LITERATURE CITED**

- 570 1. Nord, E. A. & Lynch, J. P. Plant phenology: a critical controller of soil resource acquisition.  
571 *J. Exp. Bot.* **60**, 1927–1937 (2009).
- 572 2. Wohlfahrt, G., Tomelleri, E. & Hammerle, A. The urban imprint on plant phenology. *Nat*  
573 *Ecol Evol* **3**, 1668–1674 (2019).
- 574 3. McAtee, P., Karim, S., Schaffer, R. & David, K. A dynamic interplay between

- 575 phytohormones is required for fruit development, maturation, and ripening. *Front. Plant*  
576 *Sci.* **4**, 79 (2013).
- 577 4. Goldschmidt, E. E. & Koch, K. E. Citrus. in *Photoassimilate Distribution Plants and Crops*  
578 *Source-Sink Relationships* 797–824 (Routledge, 2017).
- 579 5. Rosbakh, S. & Poschlod, P. Minimal temperature of pollen germination controls species  
580 distribution along a temperature gradient. *Ann. Bot.* **117**, 1111–1120 (2016).
- 581 6. Wolkovich, E. M., Burge, D. O., Walker, M. A. & Nicholas, K. A. Phenological diversity  
582 provides opportunities for climate change adaptation in winegrapes. *J. Ecol.* **105**, 905–912  
583 (2017).
- 584 7. Hegland, S. J., Nielsen, A., Lázaro, A., Bjerknes, A.-L. & Totland, Ø. How does climate  
585 warming affect plant-pollinator interactions? *Ecol. Lett.* **12**, 184–195 (2009).
- 586 8. Forrest, J. R. K. Plant--pollinator interactions and phenological change: what can we learn  
587 about climate impacts from experiments and observations? *Oikos* **124**, 4–13 (2015).
- 588 9. Kudo, G. & Ida, T. Y. Early onset of spring increases the phenological mismatch between  
589 plants and pollinators. *Ecology* **94**, 2311–2320 (2013).
- 590 10. Timmer, L. W., Garnsey, S. M. & Graham, J. H. *Compendium of citrus diseases*.  
591 [http://www.sidalc.net/cgi-](http://www.sidalc.net/cgi-bin/wxis.exe/?IsisScript=orton.xis&method=post&formato=2&cantidad=1&expresion=mfn=075100)  
592 [bin/wxis.exe/?IsisScript=orton.xis&method=post&formato=2&cantidad=1&expresion=mfn](http://www.sidalc.net/cgi-bin/wxis.exe/?IsisScript=orton.xis&method=post&formato=2&cantidad=1&expresion=mfn=075100)  
593 [=075100](http://www.sidalc.net/cgi-bin/wxis.exe/?IsisScript=orton.xis&method=post&formato=2&cantidad=1&expresion=mfn=075100) (1988).
- 594 11. Baker, R. A. Potential dietary benefits of citrus pectin and fiber. *Food Technol.* **48**, 133–139  
595 (1994).
- 596 12. Economos, C. & Clay, W. D. Nutritional and health benefits of citrus fruits. *Energy* **62**, 37  
597 (1999).

- 598 13. Albrigo, L. G., Beck, H. W. & Valiente, J. I. TESTING A FLOWERING EXPERT  
599 SYSTEM FOR THE ‘DECISION INFORMATION SYSTEM FOR CITRUS’. *Acta*  
600 *Horticulturae* 17–24 (2006) doi:10.17660/actahortic.2006.707.1.
- 601 14. Bellows, T. S., Morse, J. G. & Lovatt, C. J. MODELLING FLOWER DEVELOPMENT IN  
602 CITRUS. *Manipulation of Fruiting* 115–129 (1989) doi:10.1016/b978-0-408-02608-  
603 6.50014-x.
- 604 15. Mechlia, N. B. & Carroll, J. J. Agroclimatic modeling for the simulation of phenology,  
605 yield and quality of crop production. *Int. J. Biometeorol.* **33**, 36–51 (1989).
- 606 16. Wagner, M. R. *et al.* Natural soil microbes alter flowering phenology and the intensity of  
607 selection on flowering time in a wild Arabidopsis relative. *Ecol. Lett.* **17**, 717–726 (2014).
- 608 17. Lu, T. *et al.* Rhizosphere microorganisms can influence the timing of plant flowering.  
609 *Microbiome* vol. 6 (2018).
- 610 18. Lau, J. A. & Lennon, J. T. Evolutionary ecology of plant–microbe interactions: soil  
611 microbial structure alters selection on plant traits. *New Phytol.* **192**, 215–224 (2011).
- 612 19. Lau, J. A. & Lennon, J. T. Rapid responses of soil microorganisms improve plant fitness in  
613 novel environments. *Proc. Natl. Acad. Sci. U. S. A.* **109**, 14058–14062 (2012).
- 614 20. O’Brien, A., Ginnan, N., Rebolleda-Gomez, M. & Wagner, M. R. Microbial effects on plant  
615 phenology and fitness. *Am. Journal of Botany.* 108, 1824-1837 (2021) doi:  
616 <https://doi.org/10.1002/ajb2.1743>.
- 617 21. Ginnan, N. A. *et al.* Bacterial and Fungal Next Generation Sequencing Datasets and  
618 Metadata from Citrus Infected with ‘Candidatus Liberibacter asiaticus’. *Phytobiomes* **2**, 64–  
619 70 (2018).
- 620 22. Blacutt, A. *et al.* An in vitro pipeline to screen and select citrus-associated microbiota with

- 621 potential anti-Candidatus Liberibacter asiaticus properties. *Appl. Environ. Microbiol.* (2020)  
622 doi:10.1128/AEM.02883-19.
- 623 23. Riera, N., Handique, U., Zhang, Y., Dewdney, M. M. & Wang, N. Characterization of  
624 Antimicrobial-Producing Beneficial Bacteria Isolated from Huanglongbing Escape Citrus  
625 Trees. *Front. Microbiol.* **8**, 2415 (2017).
- 626 24. Xu, J. *et al.* The structure and function of the global citrus rhizosphere microbiome. *Nat.*  
627 *Commun.* **9**, 4894 (2018).
- 628 25. Ginnan, N. A. *et al.* Disease-Induced Microbial Shifts in Citrus Indicate Microbiome-  
629 Derived Responses to Huanglongbing Across the Disease Severity Spectrum. *Phytophymes*  
630 *Journal* **4**, 375–387 (2020).
- 631 26. Schlemper, T. R. *et al.* Rhizobacterial community structure differences among sorghum  
632 cultivars in different growth stages and soils. *FEMS Microbiology Ecology* vol. 93 (2017).
- 633 27. Xu, L. *et al.* Drought delays development of the sorghum root microbiome and enriches for  
634 monoderm bacteria (vol 115, pg E4284, 2018). *Proc. Natl. Acad. Sci. U. S. A.* **115**, E4952–  
635 E4952 (2018).
- 636 28. Edwards, J. A. *et al.* Compositional shifts in root-associated bacterial and archaeal  
637 microbiota track the plant life cycle in field-grown rice. *PLoS Biol.* **16**, e2003862 (2018).
- 638 29. Chaparro, J. M., Badri, D. V. & Vivanco, J. M. Rhizosphere microbiome assemblage is  
639 affected by plant development. *ISME J.* **8**, 790–803 (2014).
- 640 30. Wagner, M. R. *et al.* Host genotype and age shape the leaf and root microbiomes of a wild  
641 perennial plant. *Nature Communications* vol. 7 (2016).
- 642 31. Xiong, C. *et al.* Plant developmental stage drives the differentiation in ecological role of the  
643 maize microbiome. *Microbiome* **9**, 171 (2021).

- 644 32. Dombrowski, N. *et al.* Root microbiota dynamics of perennial *Arabidopsis thaliana* are dependent  
645 on soil residence time but independent of flowering time. *ISME J.* **11**, 43–55 (2017).
- 646 33. Dibner, R. R. *et al.* Time outweighs the effect of host developmental stage on microbial  
647 community composition. *FEMS Microbiol. Ecol.* (2021) doi:10.1093/femsec/fiab102.
- 648 34. Gilbert, J. The Earth Microbiome Project: A new paradigm in geospatial and temporal  
649 studies of microbial ecology. *SciVee* (2012) doi:10.4016/46411.01.
- 650 35. McMurdie, P. J. & Holmes, S. phyloseq: an R package for reproducible interactive analysis  
651 and graphics of microbiome census data. *PLoS One* **8**, e61217 (2013).
- 652 36. Oksanen, J. *et al.* The vegan package. *Community ecology package* **10**, 631–637 (2007).
- 653 37. Hervé, M. RVAideMemoire: Diverse basic statistical and graphical functions. R package  
654 version 0.9-45-2. *Computer software* (2015).
- 655 38. Lahti, L., Shetty, S., Blake, T. & Salojarvi, J. Microbiome r package. *Tools Microbiome*  
656 *Anal. R.* (2017).
- 657 39. Letunic, I. & Bork, P. Interactive tree of life (iTOL) v3: an online tool for the display and  
658 annotation of phylogenetic and other trees. *Nucleic Acids Res.* **44**, W242–5 (2016).
- 659 40. Love, M., Anders, S. & Huber, W. Differential analysis of count data--the DESeq2 package.  
660 *Genome Biol.* **15**, 10–1186 (2014).
- 661 41. Ginstet, C. ggplot2: elegant graphics for data analysis. *J. R. Stat. Soc. Ser. A Stat. Soc.* **174**,  
662 245–246 (2011).
- 663 42. Kurtz, Z. D. *et al.* Sparse and compositionally robust inference of microbial ecological  
664 networks. *PLoS Comput. Biol.* **11**, e1004226 (2015).
- 665 43. Emmett, B. D., Buckley, D. H. & Drinkwater, L. E. Plant growth rate and nitrogen uptake  
666 shape rhizosphere bacterial community composition and activity in an agricultural field.

- 667 *New Phytol.* **225**, 960–973 (2020).
- 668 44. Aira, M., Gómez-Brandón, M., Lazcano, C., Bååth, E. & Domínguez, J. Plant genotype  
669 strongly modifies the structure and growth of maize rhizosphere microbial communities.  
670 *Soil Biology and Biochemistry* vol. 42 2276–2281 (2010).
- 671 45. Xu, L. *et al.* Drought delays development of the sorghum root microbiome and enriches for  
672 monoderm bacteria. *Proc. Natl. Acad. Sci. U. S. A.* **115**, E4284–E4293 (2018).
- 673 46. Gdanetz, K. & Trail, F. The Wheat Microbiome Under Four Management Strategies, and  
674 Potential for Endophytes in Disease Protection. *Phytobiomes Journal* vol. 1 158–168  
675 (2017).
- 676 47. Deyett, E. & Rolshausen, P. E. Temporal Dynamics of the Sap Microbiome of Grapevine  
677 Under High Pierce’s Disease Pressure. *Front. Plant Sci.* **10**, 1246 (2019).
- 678 48. Kraft, N. J. B. & Ackerly, D. D. Assembly of plant communities. *Ecology and the*  
679 *Environment* **8**, 67–88 (2014).
- 680 49. Cordovez, V., Dini-Andreote, F., Carrión, V. J. & Raaijmakers, J. M. Ecology and  
681 Evolution of Plant Microbiomes. *Annu. Rev. Microbiol.* **73**, 69–88 (2019).
- 682 50. Liang, Y. *et al.* Long-term soil transplant simulating climate change with latitude  
683 significantly alters microbial temporal turnover. *ISME J.* **9**, 2561–2572 (2015).
- 684 51. Liu, C. H. *et al.* Study of the antifungal activity of *Acinetobacter baumannii* LCH001 in  
685 vitro and identification of its antifungal components. *Appl. Microbiol. Biotechnol.* **76**, 459–  
686 466 (2007).
- 687 52. Kang, S.-M. *et al.* *Acinetobacter calcoaceticus* ameliorated plant growth and influenced  
688 gibberellins and functional biochemicals. *Pak. J. Bot.* **44**, 365–372 (2012).
- 689 53. Kang, S.-M. *et al.* Gibberellin production and phosphate solubilization by newly isolated



- 690 strain of *Acinetobacter calcoaceticus* and its effect on plant growth. *Biotechnol. Lett.* **31**,  
691 277–281 (2009).
- 692 54. Fridman, S., Izhaki, I., Gerchman, Y. & Halpern, M. Bacterial communities in floral nectar.  
693 *Environ. Microbiol. Rep.* **4**, 97–104 (2012).
- 694 55. Álvarez-Pérez, S. & Herrera, C. M. Composition, richness and nonrandom assembly of  
695 culturable bacterial–microfungal communities in floral nectar of Mediterranean plants.  
696 *FEMS Microbiol. Ecol.* **83**, 685–699 (2013).
- 697 56. Sebastian, J., Chandra, A. K. & Kolattukudy, P. E. Discovery of a cutinase-producing  
698 *Pseudomonas* sp. cohabiting with an apparently nitrogen-fixing *Corynebacterium* sp. in the  
699 phyllosphere. *J. Bacteriol.* **169**, 131–136 (1987).
- 700 57. Diba, F., Sannyal, S. K., Alam, S. M. S., Hossain, M. A. & Sultana, M. Plant Growth  
701 Promoting Ability of Soil Arsenite Resistant Bacteria. *Banglad. J. Microbiol.* 25–31 (2015).
- 702 58. Huo, Y. *et al.* Siderophore-producing rhizobacteria reduce heavy metal-induced oxidative  
703 stress in *Panax ginseng* Meyer. *J. Ginseng Res.* **45**, 218–227 (2021).
- 704 59. Rilling, J. I., Acuña, J. J., Sadowsky, M. J. & Jorquera, M. A. Putative Nitrogen-Fixing  
705 Bacteria Associated With the Rhizosphere and Root Endosphere of Wheat Plants Grown in  
706 an Andisol From Southern Chile. *Front. Microbiol.* **9**, 2710 (2018).
- 707 60. Tsuji, K. & Fukami, T. Community-wide consequences of sexual dimorphism: evidence  
708 from nectar microbes in dioecious plants. *Ecology* **99**, 2476–2484 (2018).
- 709 61. Ushio, M. *et al.* Microbial communities on flower surfaces act as signatures of pollinator  
710 visitation. *Scientific Reports* vol. 5 (2015).
- 711 62. Aizenberg-Gershtein, Y., Izhaki, I. & Halpern, M. Do honeybees shape the bacterial  
712 community composition in floral nectar? *PLoS One* **8**, e67556 (2013).

- 713 63. Prado, A., Marolleau, B., Vaissière, B. E., Barret, M. & Torres-Cortes, G. Insect  
714 pollination: an ecological process involved in the assembly of the seed microbiota. *Sci. Rep.*  
715 **10**, 3575 (2020).
- 716 64. Powell, J. E., Martinson, V. G., Urban-Mead, K. & Moran, N. A. Routes of Acquisition of  
717 the Gut Microbiota of the Honey Bee *Apis mellifera*. *Appl. Environ. Microbiol.* **80**, 7378–  
718 7387 (2014).
- 719 65. Kim, D.-R. *et al.* A mutualistic interaction between *Streptomyces* bacteria, strawberry  
720 plants and pollinating bees. *Nat. Commun.* **10**, 4802 (2019).
- 721 66. Cellini, A. *et al.* Pathogen-induced changes in floral scent may increase honeybee-mediated  
722 dispersal of *Erwinia amylovora*. *ISME J.* **13**, 847–859 (2019).
- 723 67. Piqué, N., Miñana-Galbis, D., Merino, S. & Tomás, J. M. Virulence Factors of *Erwinia*  
724 *amylovora*: A Review. *Int. J. Mol. Sci.* **16**, 12836–12854 (2015).
- 725 68. Rering, C. C., Beck, J. J., Hall, G. W., McCartney, M. M. & Vannette, R. L. Nectar-  
726 inhabiting microorganisms influence nectar volatile composition and attractiveness to a  
727 generalist pollinator. *New Phytol.* **220**, 750–759 (2018).
- 728 69. Martiny, A. C., Treseder, K. & Pusch, G. Phylogenetic conservatism of functional traits in  
729 microorganisms. *ISME J.* **7**, 830–838 (2013).
- 730 70. Zavala-Gonzalez, E. A. *et al.* *Arabidopsis thaliana* root colonization by the nematophagous  
731 fungus *Pochonia chlamydosporia* is modulated by jasmonate signaling and leads to  
732 accelerated flowering and improved yield. *New Phytol.* **213**, 351–364 (2017).
- 733 71. Vaingankar, J. D. & Rodrigues, B. F. Screening for efficient AM (arbuscular mycorrhizal)  
734 fungal bioinoculants for two commercially important ornamental flowering plant species of  
735 Asteraceae. *Biol. Agric. Hortic.* **28**, 167–176 (2012).

- 736 72. Liu, S. *et al.* Arbuscular mycorrhizal fungi differ in affecting the flowering of a host plant  
737 under two soil phosphorus conditions. *J Plant Ecol* **11**, 623–631 (2017).
- 738 73. Fan, Y., Luan, Y., An, L. & Yu, K. Arbuscular mycorrhizae formed by *Penicillium*  
739 *pinophilum* improve the growth, nutrient uptake and photosynthesis of strawberry with two  
740 inoculum-types. *Biotechnol. Lett.* **30**, 1489–1494 (2008).

741

742 **FIGURES**

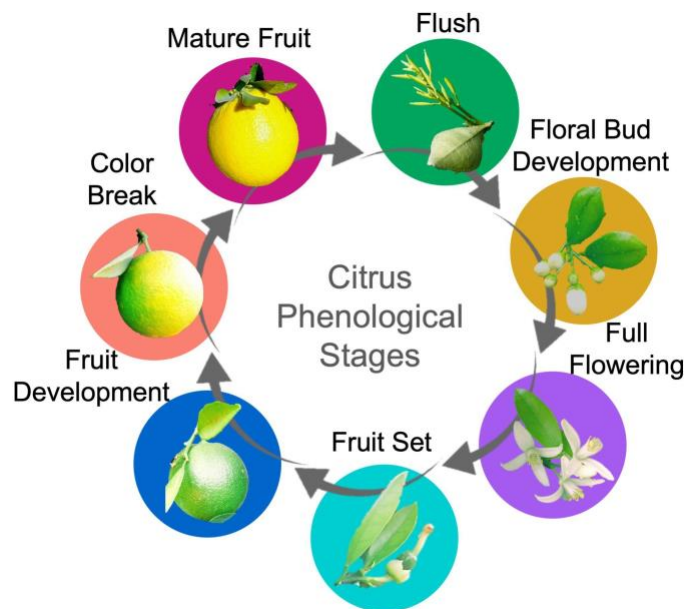

743

744 **Figure 1. Citrus phenological stages.** Cyclic seasonal development of *Citrus sinensis*.

745

746

747

748

749

750

751

752

753

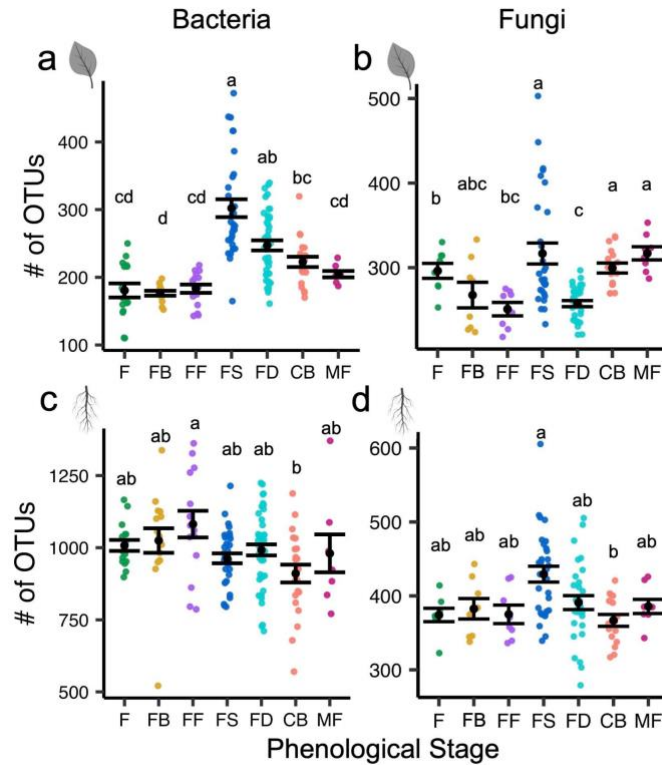

754

755 **Figure 2. Species richness varies across phenophases.** Alpha diversity plot of richness (No. of  
756 OTUs) for individual sampling events for bacterial leaf (a), fungal leaf (b), bacterial root (c), and  
757 fungal root (d) communities. Black points, “•”, represent the mean and error bars represent  
758 standard error. Letters indicate a significant difference of  $P \leq 0.05$ , determined using a Kruskal-  
759 Wallis test, with a pairwise Dunn’s test and correcting for multiple comparisons with Holm’s  
760 method. Phenological stages on the x-axis include: flush (F), floral bud break (FB), full  
761 flowering (FF), fruit set (FS), fruit development (FD), color break (CB) and mature fruit (MF).

762

763

764

765

766

767

768

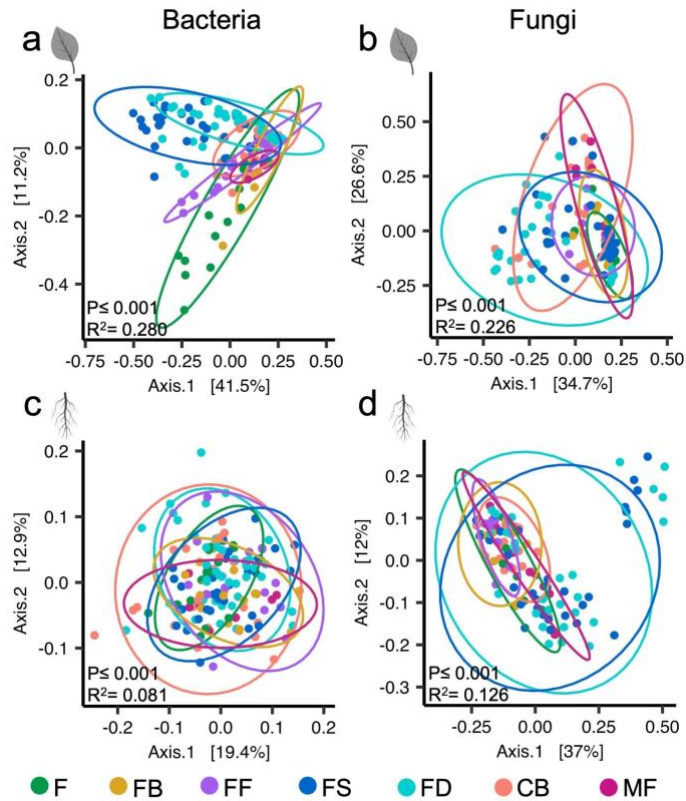

769

770 **Figure 3. Host phenology affects community diversity and composition.** Beta diversity PCoA

771 plots of bacterial leaf (a), fungal leaf (b), bacterial root (c), and fungal root (d) communities.

772 Points are colored by phenological stage and represent a complete community from a single leaf

773 or root sample. Ellipses represent 95% confidence intervals. The *P*-values and *r*<sup>2</sup> values were

774 obtained using a PERMANOVA (Adonis). Phenological stages include: flush (F), floral bud

775 break (FB), full flowering (FF), fruit set (FS), fruit development (FD), color break (CB) and

776 mature fruit (MF).

777

778

779

780

781

782

783

784

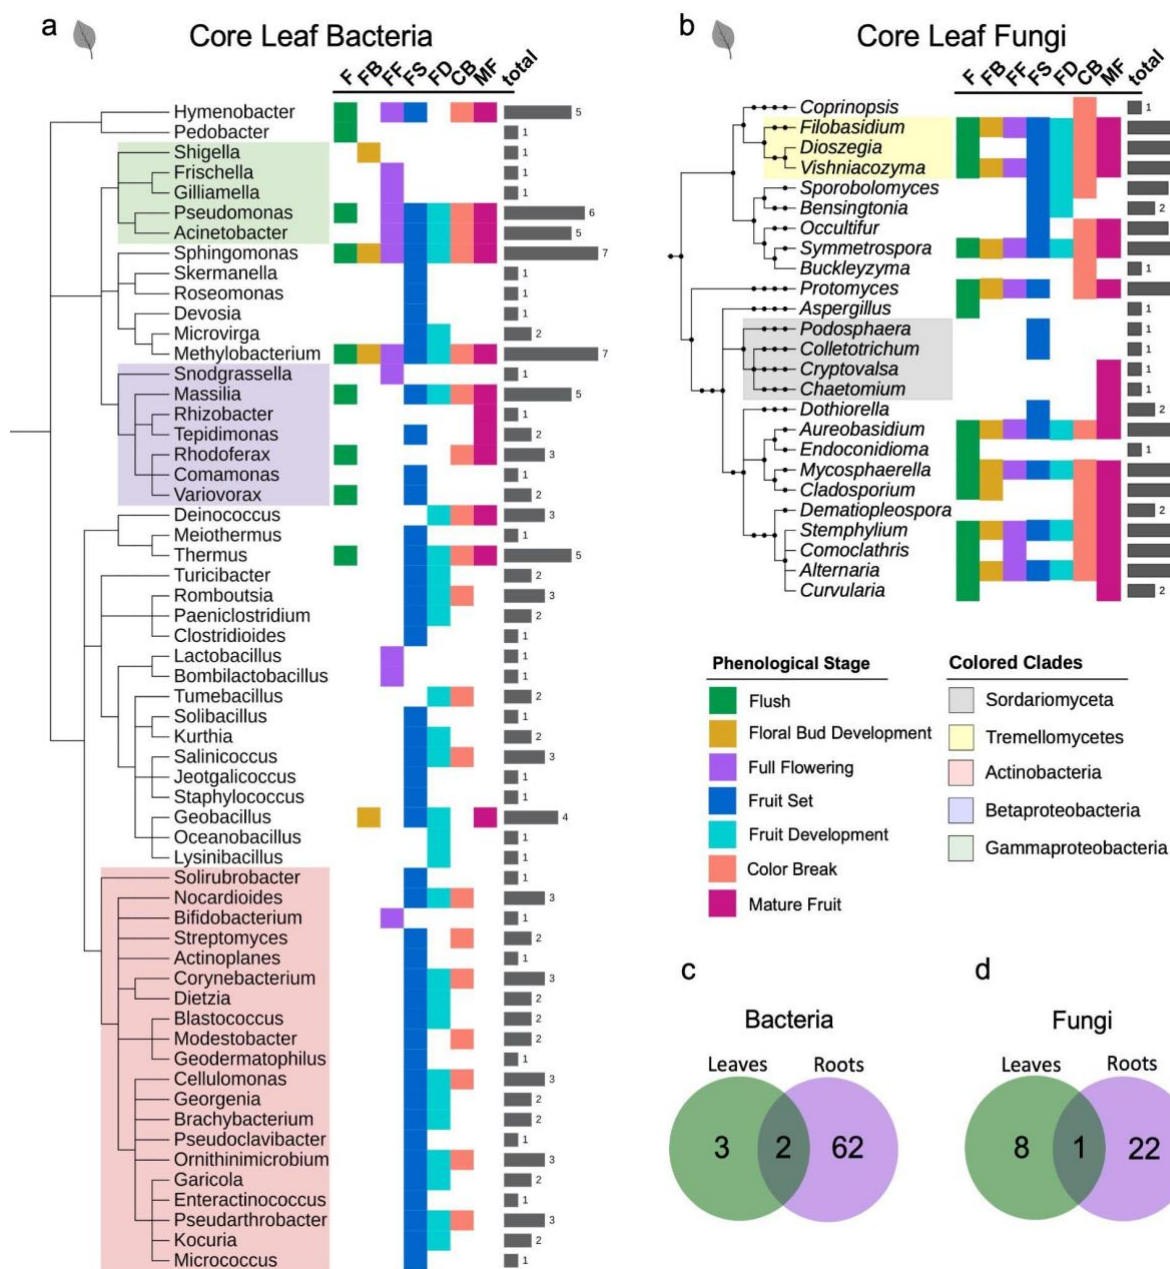

785  
 786 **Figure 4. A subset of leaf bacterial and fungal core genera have phylogenetically conserved**  
 787 **phenological association patterns.** Phylogenetic trees of leaf bacterial (a) and fungal (b) genera  
 788 that are core to one or more stages. Colored squares indicating a genus is core to flush (green),  
 789 floral bud break (gold), full flowering (purple), fruit set (blue), fruit development (light blue),  
 790 color break (salmon), and/or mature fruit (magenta). Gray bars indicate the total number of  
 791 phenological stages each genus is core during. Venn diagrams show the number of highly stable  
 792 core bacterial (c), and fungal (d) genera in leaf and root communities.

793

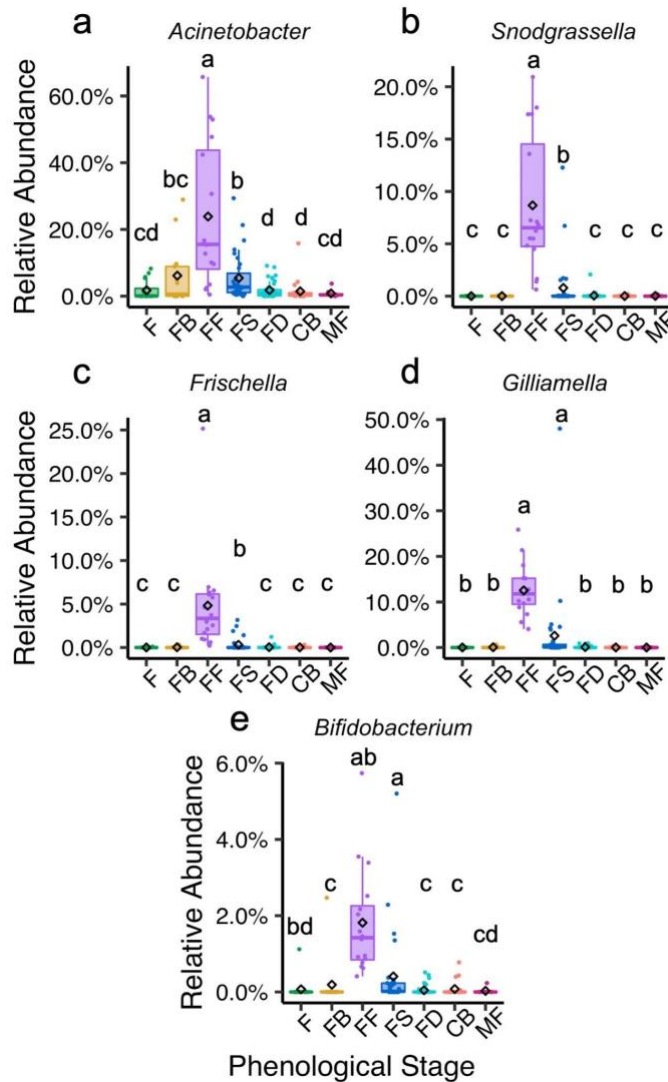

794

795 **Figure 5. Core leaf bacteriome members enriched during full flowering.** Gradually (a-b) and  
796 suddenly (c-e) enriched taxa during full flowering. The diamond symbol indicates the mean  
797 relative abundance. Letters indicate significant differences of  $P \leq 0.05$ , determined using  
798 DESeq2 GLM, Wald test with FDR adjustment. Phenological stages on the x-axis include: flush  
799 (F), floral bud break (FB), full flowering (FF), fruit set (FS), fruit development (FD), color break  
800 (CB) and mature fruit (MF).

801

802

803

804

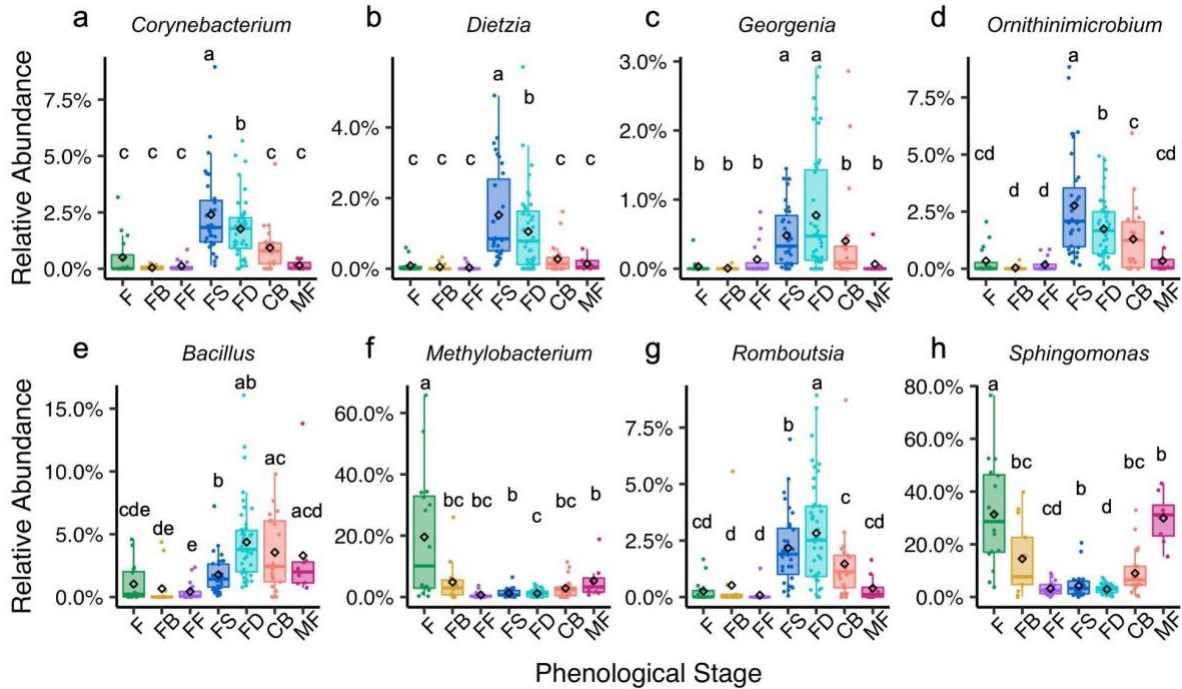

805

806 **Figure 6. Core leaf bacteriome members depleted during full flowering.** The diamond

807 symbol indicates the mean relative abundance. Letters indicate significant differences of  $P \leq$

808 0.05, determined using DESeq2 GLM, Wald test with FDR adjustment. Phenological stages on

809 the x-axis include: flush (F), floral bud break (FB), full flowering (FF), fruit set (FS), fruit

810 development (FD), color break (CB) and mature fruit (MF).

811

812

813

814

815

816

817

818

819

820

821

822

823



824

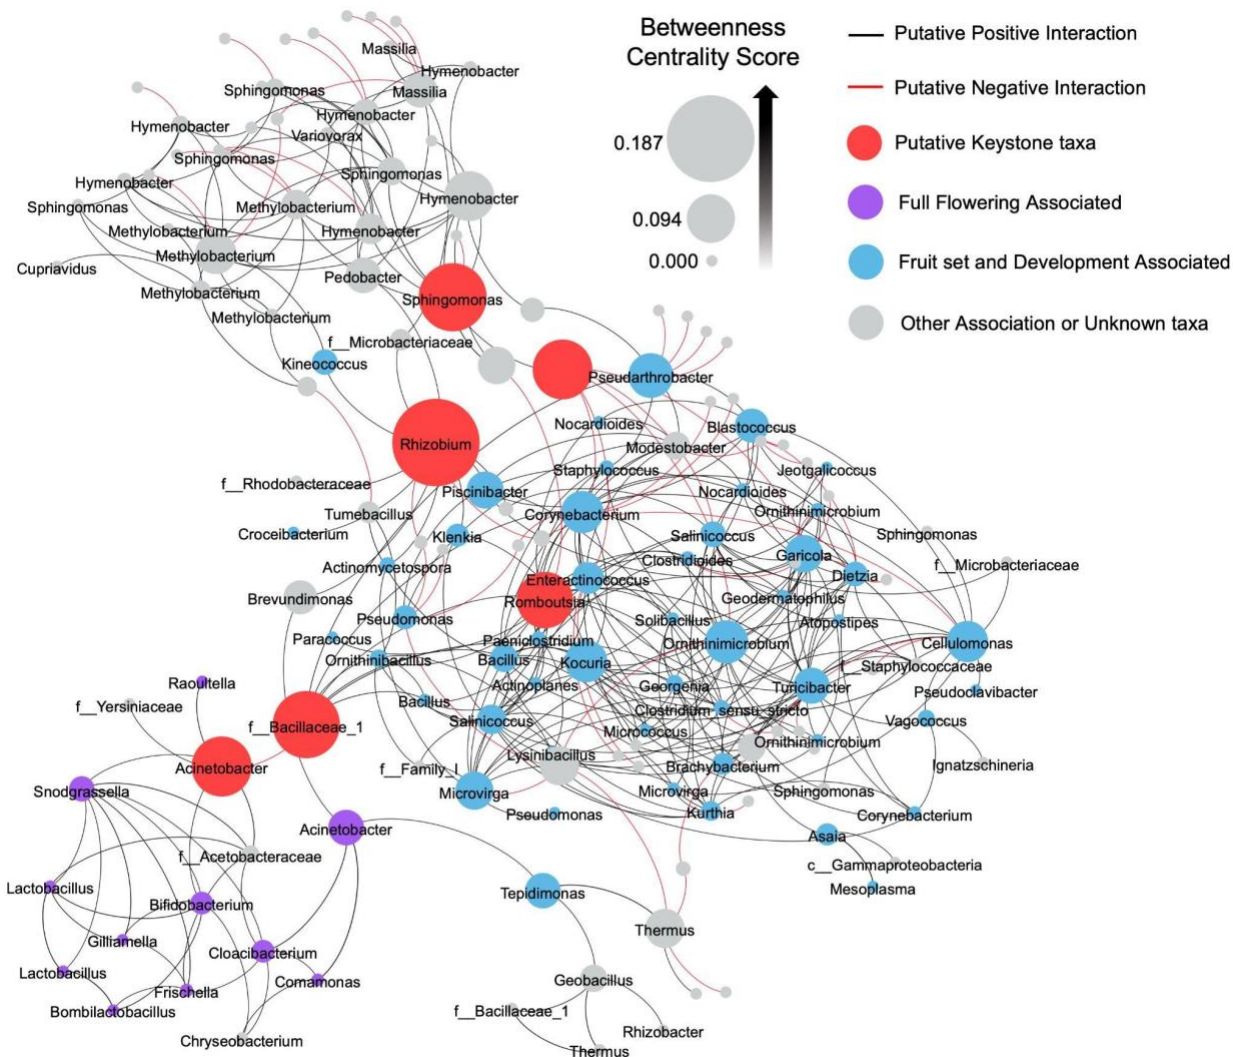

825

826 **Figure 7. Core leaf bacteriome interaction network.** Each node represents a leaf bacteria OTU

827 and is labeled with the lowest known taxonomic rank. Nodes are sized by betweenness centrality

828 scores calculated using Gephi. Red nodes are predicted keystone taxa. Purple nodes are taxa

829 significantly enriched during full flowering (FF), blue colored nodes are taxa significantly

830 enriched during fruit set (FS) and/or fruit development (FD), and grey colored nodes are not

831 significantly enriched during FF, FS, or FD. Lines represent predicted positive (black) and

832 negative (red) interactions, determined using SPIEC-EASI sparse neighborhood covariance

833 selection to infer interactions.

834 **TABLE**

835 **Table 1.** Beta diversity analysis (PERMANOVA) results for all variables. Test was performed  
 836 using the `vegan::adonis` function and weighted UniFrac distances. Green highlights indicate the  
 837 variable with the greatest  $r^2$  value (phenology).

|                               | Leaf Bacteria |                |       |          | Leaf Fungi |                |       |          |
|-------------------------------|---------------|----------------|-------|----------|------------|----------------|-------|----------|
|                               | <i>df</i>     | <i>F.Model</i> | $r^2$ | <i>P</i> | <i>df</i>  | <i>F.Model</i> | $r^2$ | <i>P</i> |
| Phenology                     | 6             | 13.640         | 0.280 | 0.001    | 6          | 6.663          | 0.226 | 0.001    |
| Sample year                   | 1             | 5.501          | 0.019 | 0.002    | 1          | 21.967         | 0.124 | 0.001    |
| Fertilizer                    | 1             | 11.770         | 0.040 | 0.001    | 1          | 2.845          | 0.016 | 0.017    |
| Avg. Temperature              | 1             | 12.359         | 0.042 | 0.001    | 1          | 1.989          | 0.011 | 0.077    |
| Hrs of irrigation             | 1             | 5.294          | 0.018 | 0.002    | 1          | 6.958          | 0.039 | 0.001    |
| Total rain                    | 1             | 6.605          | 0.023 | 0.001    | 1          | 3.421          | 0.019 | 0.005    |
| Phenology:Sample year         | 5             | 6.213          | 0.106 | 0.001    | 1          | 2.606          | 0.015 | 0.024    |
| Avg. Temp.:Hrs. of irrigation | 1             | 2.452          | 0.008 | 0.037    | 1          | 1.957          | 0.011 | 0.079    |
| Avg. Temp.:Total rain         | 1             | 6.211          | 0.021 | 0.001    | –          | –              | –     | –        |
| Residuals                     | 129           | 0.442          |       |          | 95         | 0.538          |       |          |

  

|                               | Root Bacteria |                |       |          | Root Fungi |                |       |          |
|-------------------------------|---------------|----------------|-------|----------|------------|----------------|-------|----------|
|                               | <i>df</i>     | <i>F.Model</i> | $r^2$ | <i>P</i> | <i>df</i>  | <i>F.Model</i> | $r^2$ | <i>P</i> |
| Phenology                     | 6             | 2.323          | 0.081 | 0.001    | 6          | 3.107          | 0.126 | 0.001    |
| Sample year                   | 1             | 6.132          | 0.036 | 0.001    | 1          | 8.494          | 0.057 | 0.001    |
| Fertilizer                    | 1             | 1.690          | 0.010 | 0.061    | 1          | 8.575          | 0.058 | 0.001    |
| Avg. Temperature              | 1             | 0.894          | 0.005 | 0.569    | 1          | 3.269          | 0.022 | 0.011    |
| Hrs of irrigation             | 1             | 3.486          | 0.020 | 0.001    | 1          | 4.191          | 0.028 | 0.005    |
| Total rain                    | 1             | 1.514          | 0.009 | 0.098    | 1          | 4.777          | 0.032 | 0.001    |
| Phenology:Sample year         | 5             | 1.496          | 0.043 | 0.013    | 1          | 3.487          | 0.024 | 0.006    |
| Avg. Temp.:Hrs. of irrigation | 1             | 0.893          | 0.005 | 0.542    | 1          | 1.832          | 0.012 | 0.073    |
| Avg. Temp.:Total rain         | 1             | 1.000          | 0.006 | 0.432    | –          | –              | –     | –        |
| Residuals                     | 135           | 0.785          |       |          | 95         | 0.641          |       |          |

838

839 **SUPPLEMENTAL MATERIAL LEGENDS**

840 **Supplementary Table S1. Bacterial 16S read counts.**

841

842 **Supplementary Table S2. Phenological stage Pairwise-PERMANOVA results (adjusted  $P$**   
843 **values).** Significant differences in beta diversity ( $P \leq 0.05$ ) are indicated by bolded font.

844 Phenological stages include: flush (F), floral bud break (FB), full flowering (FF), fruit set (FS),  
845 fruit development (FD), color break (CB) and mature fruit (MF).

846

847 **Supplementary Table S3. Metadata file.**

848

849 **Supplementary Table S4. All significant differentially abundant bacterial and fungal**  
850 **genera across phenological stages and tissue types.**

851

852 **Supplementary Figure S1. Environmental factors fluctuate during citrus development.** The  
853 primary phenophase displayed during each month from July 2017 to April 2019 is indicated by  
854 colors on the x-axis. a) gray bars represent total hours of irrigation each month. b) Navy bars  
855 represent mean total rainfall each month. c) Points indicate average high (red), average low  
856 (blue), and total monthly average (black) temperatures.

857

858 **Supplementary Figure S2. Sample year has minor effects on community diversity and**  
859 **composition.** Beta diversity PCoA plots of bacterial leaf (a) and bacterial root (b) communities.  
860 Points are colored by sample year and represent a complete community from a single leaf or root  
861 sample. Ellipses represent 95% confidence intervals.

862

863 **Supplementary Figure S3. Phyla level compositional changes across phenological stages.**

864 Stacked bar plots showing relative abundance of bacterial leaf (a), fungal leaf (b), bacterial root  
865 (c), and fungal root (d) phyla across phenological stages. Phenological stages on the x-axis  
866 include: flush (F), floral bud break (FB), full flowering (FF), fruit set (FS), fruit development  
867 (FD), color break (CB) and mature fruit (MF).

868

869 **Supplementary Figure S4. Phenological Core root bacterial and fungal genera.** Phylogenetic  
870 trees of root bacterial (a) and fungal (b) genera that are core to one or more stages. Colored  
871 squares indicating a genus is core to flush (green), floral bud break (gold), full flowering  
872 (purple), fruit set (blue), fruit development (light blue), color break (salmon), and/or mature fruit  
873 (magenta). Gray bars indicate the total number of phenological stages where that genus is core.  
874

875 **Supplementary Figure S5. Core leaf mycobiome members with significant enrichments.**

876 The diamond symbol represents the mean relative abundance. Letters indicate a significant  
877 difference of  $P \leq 0.05$ , determined using DESeq2 GLM, Wald test with FDR adjustment.  
878 Phenological stages on the x-axis include: flush (F), floral bud break (FB), full flowering (FF),  
879 fruit set (FS), fruit development (FD), color break (CB) and mature fruit (MF).
